# Supplementary material
Source: MDPI journal article supplement (https://www.mdpi.com/2624-7402/3/4/55)
Supplement: s1 [file s1]

## SUPPLEMENTARY 1

**TABLE S1.** The pH values of the various samples measured on days 0, 3, 5, 12, 22 and 30 of silage fermentation.

| Sample No: | pH VALUES |       |       |        |        |        |
|------------|-----------|-------|-------|--------|--------|--------|
|            | Day 0     | Day 3 | Day 5 | Day 12 | Day 22 | Day 30 |
| 1          | 5.04      | 5.07  | 5.02  | 4.33   | 4.22   | 4.53   |
| 2          | 5.00      | 5.14  | 4.86  | 4.38   | 4.38   | 4.58   |
| 3          | 4.99      | 5.08  | 4.73  | 4.34   | 4.37   | 4.59   |
| 4          | 5.04      | 4.88  | 4.55  | 4.37   | 4.44   | 4.58   |
| 5          | 5.14      | 5.17  | 4.54  | 4.29   | 4.41   | 4.56   |
| 6          | 5.03      | 5.11  | 4.44  | 4.25   | 4.42   | 4.58   |
| 7          | 5.07      | 4.91  | 4.58  | 4.36   | 4.38   | 4.57   |
| 8          | 5.15      | 4.94  | 4.35  | 4.42   | 4.32   | 4.50   |
| 9          | 5.09      | 4.93  | 4.46  | 4.41   | 4.28   | 4.30   |
| 10         | 5.08      | 5.02  | 4.41  | 4.36   | 4.31   | 4.44   |
| 11         | 5.04      | 5.01  | 4.38  | 4.38   | 4.36   | 4.40   |
| 12         | 5.01      | 4.64  | 4.52  | 4.40   | 4.53   | 4.56   |
| 13         | 5.01      | 4.82  | 4.48  | 4.30   | 4.44   | 4.49   |
| 14         | 4.94      | 4.81  | 4.29  | 4.31   | 4.42   | 4.48   |
| 15         | 4.86      | 4.71  | 4.41  | 4.34   | 4.44   | 4.48   |
| 16         | 4.97      | 4.78  | 4.43  | 4.36   | 4.43   | 4.47   |
| 17         | 4.95      | 4.99  | 4.70  | 4.32   | 4.37   | 4.35   |
| 18         | 4.91      | 4.94  | 4.52  | 4.42   | 4.44   | 4.45   |
| 19         | 4.98      | 4.72  | 4.41  | 4.39   | 4.37   | 4.36   |
| 20         | 4.99      | 4.71  | 4.37  | 4.33   | 4.39   | 4.33   |
| 21         | 5.10      | 4.85  | 4.41  | 4.36   | 4.45   | 4.31   |
| 22         | 5.08      | 4.64  | 4.39  | 4.35   | 4.52   | 4.52   |
| 23         | 4.85      | 4.63  | 4.38  | 4.32   | 4.41   | 4.45   |
| 24         | 4.9       | 4.63  | 4.38  | 4.32   | 4.31   | 4.35   |
| 25         | 4.93      | 4.59  | 4.38  | 4.35   | 4.4    | 4.45   |
| 26         | 4.94      | 4.57  | 4.37  | 4.28   | 4.34   | 4.35   |
| 27         | 5.04      | 4.54  | 4.35  | 4.26   | 4.29   | 4.3    |
| 28         | 4.96      | 4.53  | 4.33  | 4.34   | 4.33   | 4.37   |
| 29         | 4.99      | 4.61  | 4.35  | 4.27   | 4.25   | 4.26   |
| 30         | 4.95      | 4.84  | 4.56  | 4.30   | 4.27   | 4.33   |
| 31         | 4.84      | 4.92  | 4.46  | 4.34   | 4.40   | 4.44   |
| 32         | 4.79      | 5.24  | 4.42  | 4.27   | 4.41   | 4.46   |
| 33         | 4.96      | 5.05  | 4.40  | 4.33   | 4.43   | 4.47   |
| 34         | 4.96      | 5.05  | 4.37  | 4.31   | 4.41   | 4.45   |

**TABLE S1 (Continued).** The pH values of the various samples measured on days 0, 3, 5, 12, 22 and 30 of silage fermentation.

|                     | <b>pH VALUES</b> |              |              |               |               |               |
|---------------------|------------------|--------------|--------------|---------------|---------------|---------------|
| <b>Sample No:</b>   | <b>Day 0</b>     | <b>Day 3</b> | <b>Day 5</b> | <b>Day 12</b> | <b>Day 22</b> | <b>Day 30</b> |
| 35                  | 5.00             | 4.81         | 4.36         | 4.34          | 4.39          | 4.40          |
| 36                  | 4.89             | 4.84         | 4.42         | 4.32          | 4.40          | 4.45          |
| 37                  | 5.08             | 4.99         | 4.35         | 4.27          | 4.29          | 4.35          |
| 38                  | 5.08             | 5.01         | 4.37         | 4.31          | 4.32          | 4.35          |
| 39                  | 4.76             | 4.82         | 4.29         | 4.29          | 4.46          | 4.54          |
| 40                  | 4.99             | 4.87         | 4.34         | 4.28          | 4.39          | 4.43          |
| 41                  | 4.95             | 4.81         | 4.36         | 4.29          | 4.38          | 4.47          |
| 42                  | 4.83             | 4.83         | 4.26         | 4.26          | 4.44          | 4.52          |
| 43                  | 4.98             | 4.64         | 4.18         | 4.25          | 4.37          | 4.51          |
| 44                  | 4.90             | 4.52         | 4.23         | 4.28          | 4.30          | 4.42          |
| 45                  | 5.02             | 4.71         | 4.21         | 4.28          | 4.32          | 4.36          |
| 46                  | 4.95             | 4.58         | 4.18         | 4.28          | 4.45          | 4.56          |
| 47                  | 4.95             | 4.65         | 4.26         | 4.26          | 4.52          | 4.57          |
| 48                  | 5.05             | 4.62         | 4.16         | 4.24          | 4.44          | 4.48          |
| 49                  | 5.01             | 4.81         | 4.21         | 4.28          | 4.43          | 4.51          |
| 50                  | 5.06             | 4.62         | 4.24         | 4.28          | 4.39          | 4.43          |
| 51                  | 4.93             | 4.54         | 4.29         | 4.29          | 4.41          | 4.4           |
| 52                  | 4.96             | 4.48         | 4.21         | 4.28          | 4.41          | 4.45          |
| 53                  | 5.00             | 4.47         | 4.20         | 4.22          | 4.46          | 4.52          |
| 54                  | 4.95             | 4.41         | 4.19         | 4.27          | 4.41          | 4.49          |
| 55                  | 4.81             | 4.43         | 4.26         | 4.27          | 4.46          | 4.46          |
| 56                  | 5.01             | 4.47         | 4.31         | 4.31          | 4.50          | 4.48          |
| 57                  | 5.32             | 4.54         | 4.16         | 4.28          | 4.49          | 4.51          |
| 58                  | 5.23             | 4.41         | 4.23         | 4.26          | 4.41          | 4.41          |
| 59                  | 5.34             | 4.42         | 4.19         | 4.2           | 4.51          | 4.49          |
| 60                  | 5.23             | 4.43         | 4.3          | 4.25          | 4.43          | 4.45          |
| 61                  | 5.41             | 4.55         | 4.14         | 4.23          | 4.39          | 4.42          |
| 62                  | 5.31             | 4.42         | 4.07         | 4.25          | 4.41          | 4.42          |
| 63                  | 5.23             | 4.36         | 4.13         | 4.31          | 4.42          | 4.41          |
| 64                  | 5.52             | 4.37         | 4.18         | 4.25          | 4.40          | 4.43          |
| 65                  | 5.46             | 4.37         | 4.14         | 4.23          | 4.37          | 4.48          |
| 66                  | 5.80             | 4.37         | 4.2          | 4.2           | 4.45          | 4.48          |
| <b>67 (control)</b> | 5.87             | 4.38         | 4.23         | 4.2           | 4.21          | 4.26          |

**TABLE S2.** Total acidity expressed as % lactic acid for the samples taken on days 0, 3, 5, 12, 22 and 30 of silage fermentation.

|                   | <b>Total acidity (% lactic acid w/v)</b> |              |              |               |               |               |
|-------------------|------------------------------------------|--------------|--------------|---------------|---------------|---------------|
| <b>Sample No:</b> | <b>Day 0</b>                             | <b>Day 3</b> | <b>Day 5</b> | <b>Day 12</b> | <b>Day 22</b> | <b>Day 30</b> |
| 1                 | 0.360                                    | 0.630        | 1.580        | 2.475         | 2.385         | 2.610         |
| 2                 | 0.360                                    | 0.630        | 1.305        | 2.070         | 2.025         | 2.250         |
| 3                 | 0.360                                    | 0.585        | 1.395        | 2.115         | 2.250         | 2.295         |
| 4                 | 0.360                                    | 0.765        | 1.530        | 2.160         | 2.250         | 2.160         |
| 5                 | 0.320                                    | 0.675        | 1.440        | 2.070         | 2.475         | 2.520         |
| 6                 | 0.360                                    | 0.810        | 2.295        | 2.070         | 2.295         | 2.520         |
| 7                 | 0.360                                    | 0.810        | 1.458        | 2.160         | 2.115         | 2.610         |
| 8                 | 0.360                                    | 0.855        | 1.530        | 2.250         | 2.385         | 2.700         |
| 9                 | 0.360                                    | 0.900        | 1.580        | 2.205         | 2.475         | 2.745         |
| 10                | 0.360                                    | 0.630        | 1.395        | 2.025         | 2.070         | 2.520         |
| 11                | 0.360                                    | 0.855        | 1.665        | 2.295         | 2.565         | 2.745         |
| 12                | 0.360                                    | 0.855        | 1.485        | 2.790         | 2.925         | 3.105         |
| 13                | 0.360                                    | 0.765        | 1.710        | 2.610         | 2.790         | 2.880         |
| 14                | 0.400                                    | 0.765        | 1.395        | 1.980         | 2.115         | 1.980         |
| 15                | 0.400                                    | 0.810        | 1.440        | 2.070         | 2.115         | 2.250         |
| 16                | 0.400                                    | 0.810        | 1.350        | 1.890         | 1.845         | 2.070         |
| 17                | 0.400                                    | 0.675        | 1.395        | 1.350         | 2.025         | 2.070         |
| 18                | 0.400                                    | 0.630        | 1.485        | 2.070         | 2.025         | 1.845         |
| 19                | 0.400                                    | 0.990        | 1.530        | 2.025         | 2.160         | 2.430         |
| 20                | 0.400                                    | 0.945        | 1.710        | 1.980         | 2.160         | 2.205         |
| 21                | 0.360                                    | 0.990        | 1.530        | 2.340         | 2.385         | 2.520         |
| 22                | 0.360                                    | 0.810        | 1.440        | 1.800         | 2.025         | 2.385         |
| 23                | 0.360                                    | 0.855        | 1.440        | 1.800         | 2.115         | 2.250         |
| 24                | 0.360                                    | 0.900        | 1.485        | 1.890         | 2.070         | 2.070         |
| 25                | 0.360                                    | 0.765        | 1.395        | 1.935         | 2.115         | 2.115         |
| 26                | 0.360                                    | 1.170        | 1.350        | 2.070         | 2.160         | 2.025         |
| 27                | 0.360                                    | 1.035        | 1.530        | 2.070         | 2.430         | 2.385         |
| 28                | 0.360                                    | 1.125        | 1.485        | 2.385         | 2.295         | 2.520         |
| 29                | 0.360                                    | 0.990        | 1.755        | 2.160         | 2.340         | 2.340         |
| 30                | 0.400                                    | 0.720        | 1.305        | 1.980         | 2.115         | 2.205         |
| 31                | 0.360                                    | 0.630        | 1.350        | 2.070         | 2.115         | 2.385         |
| 32                | 0.360                                    | 0.540        | 1.440        | 2.025         | 2.070         | 2.115         |
| 33                | 0.360                                    | 0.630        | 1.260        | 1.845         | 2.115         | 2.115         |
| 34                | 0.360                                    | 0.630        | 1.530        | 2.090         | 2.070         | 2.070         |

**TABLE S2 (Continued).** Total acidity expressed as % lactic acid for the samples taken on days 0, 3, 5, 12, 22 and 30 of silage fermentation.

|                   | Total acidity (% lactic acid w/v) |       |       |        |        |        |
|-------------------|-----------------------------------|-------|-------|--------|--------|--------|
| Sample No:        | Day 0                             | Day 3 | Day 5 | Day 12 | Day 22 | Day 30 |
| 36                | 0.360                             | 0.765 | 1.350 | 1.890  | 2.610  | 2.340  |
| 37                | 0.360                             | 0.630 | 1.575 | 2.115  | 2.565  | 2.385  |
| 38                | 0.360                             | 0.630 | 1.395 | 1.980  | 2.115  | 2.205  |
| 39                | 0.460                             | 0.720 | 1.395 | 1.980  | 2.430  | 2.340  |
| 40                | 0.360                             | 0.675 | 1.530 | 1.890  | 2.025  | 1.890  |
| 41                | 0.360                             | 0.720 | 1.395 | 1.935  | 2.160  | 1.980  |
| 42                | 0.360                             | 0.765 | 1.395 | 1.845  | 2.025  | 2.205  |
| 43                | 0.360                             | 1.080 | 1.485 | 1.980  | 2.025  | 2.250  |
| 44                | 0.360                             | 1.035 | 1.530 | 1.890  | 2.115  | 2.160  |
| 45                | 0.360                             | 1.035 | 1.485 | 1.890  | 2.340  | 2.070  |
| 46                | 0.360                             | 0.900 | 1.215 | 1.890  | 2.295  | 2.070  |
| 47                | 0.360                             | 0.810 | 1.305 | 1.980  | 1.980  | 2.025  |
| 48                | 0.360                             | 0.810 | 1.440 | 2.025  | 2.115  | 2.025  |
| 49                | 0.360                             | 0.675 | 1.350 | 1.890  | 1.980  | 2.115  |
| 50                | 0.360                             | 0.855 | 1.305 | 1.890  | 1.845  | 2.070  |
| 51                | 0.360                             | 0.990 | 1.485 | 2.070  | 2.070  | 2.025  |
| 52                | 0.360                             | 0.900 | 1.260 | 1.890  | 1.980  | 2.070  |
| 53                | 0.360                             | 0.810 | 1.395 | 2.090  | 2.025  | 2.250  |
| 54                | 0.360                             | 0.810 | 1.710 | 2.025  | 1.935  | 2.025  |
| 55                | 0.360                             | 0.990 | 1.305 | 2.025  | 2.025  | 2.115  |
| 56                | 0.360                             | 0.810 | 1.350 | 2.090  | 2.090  | 2.025  |
| 57                | 0.270                             | 0.855 | 1.395 | 1.890  | 2.115  | 2.520  |
| 58                | 0.270                             | 0.990 | 1.440 | 1.980  | 2.025  | 2.160  |
| 59                | 0.270                             | 0.855 | 1.305 | 2.610  | 1.935  | 1.980  |
| 60                | 0.270                             | 0.900 | 1.530 | 1.980  | 2.160  | 2.025  |
| 61                | 0.270                             | 0.990 | 1.530 | 2.340  | 2.250  | 2.250  |
| 62                | 0.270                             | 0.945 | 1.485 | 1.980  | 2.025  | 1.980  |
| 63                | 0.270                             | 0.990 | 1.530 | 2.090  | 2.090  | 2.070  |
| 64                | 0.270                             | 1.080 | 1.440 | 1.980  | 2.115  | 2.115  |
| 65                | 0.270                             | 1.035 | 1.485 | 2.025  | 2.025  | 2.115  |
| 66                | 0.270                             | 0.945 | 1.440 | 2.610  | 2.340  | 2.340  |
| <b>67 control</b> | 0.270                             | 0.855 | 1.215 | 2.610  | 2.070  | 2.025  |

**TABLE S3.** Total Lactic acid bacteria count for the samples taken at different sampling times (on days 0. 3. 5.12. 22 and 30) of silage fermentation.

|            | Lactic acid bacteria cfu/gr |       |       |        |        |        |
|------------|-----------------------------|-------|-------|--------|--------|--------|
| Sample No: | Day 0                       | Day 3 | Day 5 | Day 12 | Day 22 | Day 30 |
| 1          | 7.4                         | 8.5   | 9.4   | 8.7    | 7.5    | 8.4    |
| 2          | 7.4                         | 8.4   | 8.6   | 7.5    | 5.2    | 5.8    |
| 3          | 6.5                         | 7.6   | 7.7   | 7.4    | 5.3    | 5.0    |
| 4          | 7.5                         | 8.1   | 8.4   | 7.9    | 5.1    | 4.5    |
| 5          | 6.8                         | 7.9   | 8.2   | 7.3    | 4.9    | 4.4    |
| 6          | 6.4                         | 6.8   | 8.2   | 7.0    | 5.4    | 5.0    |
| 7          | 6.0                         | 6.4   | 8.1   | 7.6    | 5.2    | 4.7    |
| 8          | 6.7                         | 7.0   | 8.0   | 7.7    | 4.8    | 4.6    |
| 9          | 6.0                         | 6.3   | 7.5   | 7.5    | 6.2    | 4.9    |
| 10         | 7.5                         | 8.2   | 8.1   | 7.8    | 6.6    | 6.2    |
| 11         | 7.4                         | 7.8   | 7.9   | 8.6    | 4.3    | 6.5    |
| 12         | 7.8                         | 8.7   | 8.2   | 8.5    | 5.2    | 4.3    |
| 13         | 7.6                         | 8.2   | 8.0   | 7.5    | 5.1    | 4.1    |
| 14         | 7.6                         | 8.3   | 8.6   | 7.6    | 5.5    | 5.8    |
| 15         | 7.3                         | 8.0   | 8.8   | 7.6    | 6.2    | 4.6    |
| 16         | 7.7                         | 8.2   | 8.8   | 7.3    | 6.2    | 6.0    |
| 17         | 7.0                         | 7.1   | 9.1   | 7.7    | 5.4    | 5.5    |
| 18         | 6.9                         | 7.1   | 8.6   | 7.9    | 6.1    | 4.4    |
| 19         | 7.8                         | 8.1   | 8.4   | 8.8    | 6.2    | 4.5    |
| 20         | 7.5                         | 7.9   | 8.4   | 8.0    | 6.0    | 5.8    |
| 21         | 7.8                         | 8.2   | 8.8   | 7.8    | 6.4    | 6.0    |
| 22         | 7.6                         | 8.8   | 8.5   | 8.2    | 6.1    | 5.3    |
| 23         | 7.4                         | 8.5   | 8.7   | 7.9    | 6.4    | 5.7    |
| 24         | 6.9                         | 7.8   | 8.9   | 7.8    | 6.3    | 5.3    |
| 25         | 7.7                         | 8.3   | 8.5   | 8.1    | 5.4    | 5.0    |
| 26         | 7.5                         | 8.3   | 8.8   | 8.0    | 6.1    | 5.7    |
| 27         | 7.2                         | 7.9   | 8.6   | 8.3    | 5.6    | 6.0    |
| 28         | 7.7                         | 8.2   | 8.9   | 7.6    | 6.0    | 6.9    |
| 29         | 7.4                         | 8.1   | 8.8   | 8.1    | 5.6    | 6.2    |
| 30         | 6.8                         | 7.0   | 8.8   | 8.0    | 5.3    | 6.7    |
| 31         | 7.9                         | 8.7   | 8.3   | 7.5    | 6.3    | 4.7    |
| 32         | 7.6                         | 8.3   | 8.2   | 7.4    | 6.3    | 5.5    |
| 33         | 7.2                         | 7.7   | 8.4   | 8.5    | 5.0    | 5.9    |
| 34         | 7.1                         | 7.6   | 8.6   | 8.1    | 5.7    | 4.3    |

**TABLE S3 (Continued).** Total Lactic acid bacteria count for the samples taken at different sampling times (on days 0. 3. 5.12. 22 and 30) of silage fermentation.

|            | Lactic acid bacteria cfu/gr |       |       |        |        |        |
|------------|-----------------------------|-------|-------|--------|--------|--------|
| Sample No: | Day 0                       | Day 3 | Day 5 | Day 12 | Day 22 | Day 30 |
| 35         | 7.3                         | 8.0   | 8.7   | 7.6    | 5.6    | 4.2    |
| 36         | 6.6                         | 7.1   | 8.6   | 7.3    | 5.3    | 5.0    |
| 37         | 6.8                         | 7.3   | 8.6   | 9.8    | 6.3    | 6.0    |
| 38         | 6.0                         | 6.6   | 8.4   | 8.9    | 6.3    | 5.0    |
| 39         | 7.6                         | 8.7   | 8.3   | 8.1    | 5.0    | 5.5    |
| 40         | 7.1                         | 7.8   | 8.6   | 7.7    | 5.7    | 4.3    |
| 41         | 7.0                         | 7.7   | 8.5   | 7.8    | 6.0    | 5.3    |
| 42         | 7.3                         | 7.9   | 8.8   | 8.0    | 6.0    | 5.3    |
| 43         | 7.7                         | 8.2   | 9.6   | 7.5    | 5.7    | 5.5    |
| 44         | 7.1                         | 8.0   | 9.3   | 7.6    | 5.7    | 5.3    |
| 45         | 7.0                         | 7.7   | 9.9   | 7.8    | 6.6    | 5.7    |
| 46         | 7.5                         | 8.2   | 8.7   | 7.6    | 5.8    | 5.5    |
| 47         | 7.1                         | 7.8   | 9.0   | 7.8    | 5.9    | 5.6    |
| 48         | 6.9                         | 7.3   | 8.8   | 7.5    | 5.4    | 5.5    |
| 49         | 6.8                         | 7.3   | 8.7   | 7.8    | 5.6    | 4.1    |
| 50         | 6.9                         | 7.1   | 8.6   | 7.7    | 6.3    | 5.6    |
| 51         | 6.2                         | 7.0   | 9.9   | 8.1    | 5.4    | 5.7    |
| 52         | 7.7                         | 8.3   | 9.7   | 8.5    | 6.4    | 5.7    |
| 53         | 6.1                         | 6.8   | 9.9   | 7.5    | 5.4    | 5.8    |
| 54         | 7.0                         | 8.0   | 8.5   | 8.2    | 5.3    | 5.3    |
| 55         | 8.2                         | 8.9   | 9.4   | 7.8    | 5.3    | 5.5    |
| 56         | 7.3                         | 7.9   | 8.3   | 7.0    | 5.1    | 5.0    |
| 57         | 7.5                         | 8.2   | 9.2   | 8.4    | 5.9    | 5.3    |
| 58         | 6.8                         | 8.1   | 8.8   | 8.0    | 5.7    | 5.3    |
| 59         | 6.7                         | 7.8   | 9.1   | 7.6    | 5.5    | 5.0    |
| 60         | 7.1                         | 7.7   | 8.6   | 7.3    | 5.4    | 5.3    |
| 61         | 7.6                         | 8.5   | 8.7   | 8.0    | 6.0    | 5.8    |
| 62         | 7.7                         | 8.2   | 9.7   | 7.4    | 6.0    | 6.1    |
| 63         | 5.7                         | 6.9   | 9.8   | 7.9    | 5.8    | 6.7    |
| 64         | 6.0                         | 8.3   | 9.6   | 8.2    | 5.7    | 6.2    |
| 65         | 6.4                         | 7.7   | 9.8   | 8.1    | 6.3    | 6.8    |
| 66         | 5.8                         | 8.6   | 9.4   | 8.0    | 5.8    | 6.1    |
| 67 control | 5.0                         | 8.7   | 8.4   | 7.9    | 5.9    | 5.8    |

**Table S4.** Total Yeasts and Molds count for the samples taken at different sampling times (on days 0, 3, 5, 12, 22 and 30) of silage fermentation.

| Sample No: | Yeasts and Molds cfu/gr |       |       |        |        |        |
|------------|-------------------------|-------|-------|--------|--------|--------|
|            | Day 0                   | Day 3 | Day 5 | Day 12 | Day 22 | Day 30 |
| 1          | 8.5                     | 8.3   | 6.8   | 5.5    | 0.5    | 0.1    |
| 2          | 8.5                     | 8.3   | 5.6   | 4.5    | 1.3    | 1.6    |
| 3          | 7.9                     | 7.4   | 5.5   | 3.5    | 0.5    | 0.1    |
| 4          | 7.8                     | 7.6   | 5.5   | 3.3    | 0.5    | 2.3    |
| 5          | 6.2                     | 6.9   | 5.3   | 3.3    | 0.5    | 2.0    |
| 6          | 6.7                     | 6.5   | 5.0   | 4.0    | 0.5    | 2.0    |
| 7          | 6.5                     | 6.3   | 6.3   | 4.8    | 1.8    | 0.1    |
| 8          | 8.3                     | 8.0   | 5.0   | 3.2    | 1.0    | 2.0    |
| 9          | 6.8                     | 6.6   | 5.3   | 4.5    | 1.3    | 0.1    |
| 10         | 8.1                     | 8.0   | 5.0   | 3.1    | 1.6    | 0.1    |
| 11         | 8.0                     | 7.8   | 5.7   | 4.5    | 1.5    | 0.1    |
| 12         | 8.5                     | 8.4   | 7.1   | 4.0    | 2.7    | 2.0    |
| 13         | 8.2                     | 8.1   | 5.5   | 4.5    | 2.3    | 0.1    |
| 14         | 8.4                     | 8.3   | 5.3   | 4.6    | 1.3    | 0.1    |
| 15         | 8.0                     | 7.9   | 5.0   | 5.3    | 0.5    | 2.0    |
| 16         | 7.1                     | 6.9   | 6.5   | 4.8    | 0.5    | 2.3    |
| 17         | 8.3                     | 8.1   | 5.8   | 5.1    | 0.5    | 2.0    |
| 18         | 6.0                     | 5.5   | 5.3   | 4.6    | 1.0    | 0.1    |
| 19         | 6.7                     | 6.4   | 6.1   | 3.6    | 0.5    | 0.1    |
| 20         | 6.8                     | 6.5   | 5.9   | 5.0    | 0.5    | 2.0    |
| 21         | 6.9                     | 6.6   | 5.0   | 4.3    | 1.0    | 2.3    |
| 22         | 8.8                     | 8.7   | 6.9   | 3.6    | 1.3    | 0.1    |
| 23         | 5.9                     | 5.8   | 5.7   | 5.8    | 0.5    | 0.1    |
| 24         | 7.0                     | 6.9   | 5.8   | 4.3    | 0.5    | 0.1    |
| 25         | 7.1                     | 6.9   | 6.0   | 4.7    | 0.5    | 2.0    |
| 26         | 8.9                     | 8.8   | 6.4   | 3.7    | 1.0    | 0.1    |
| 27         | 6.0                     | 5.3   | 5.9   | 4.5    | 0.5    | 0.1    |
| 28         | 6.2                     | 6.0   | 5.0   | 3.7    | 0.5    | 0.1    |
| 29         | 6.7                     | 6.7   | 5.3   | 4.0    | 0.5    | 2.0    |
| 30         | 5.5                     | 6.8   | 5.9   | 4.5    | 0.5    | 0.1    |
| 31         | 8.5                     | 8.4   | 6.6   | 3.5    | 0.5    | 2.0    |
| 32         | 8.5                     | 8.3   | 5.9   | 3.5    | 0.5    | 0.1    |
| 33         | 8.3                     | 8.5   | 6.0   | 4.8    | 0.5    | 0.1    |
| 34         | 7.5                     | 7.1   | 5.3   | 4.8    | 1.5    | 0.1    |

**Table S4 (Continued).** Total Yeasts and Molds count for the samples taken at different sampling times (on day 0, 3, 5, 12, 22 and 30) of silage fermentation.

|                   | Yeasts and Molds cfu/gr |       |       |        |        |        |
|-------------------|-------------------------|-------|-------|--------|--------|--------|
| Sample No:        | Day 0                   | Day 3 | Day 5 | Day 12 | Day 22 | Day 30 |
| 35                | 7.6                     | 7.1   | 6.3   | 3.6    | 1.5    | 2.0    |
| 36                | 6.4                     | 6.1   | 5.8   | 3.4    | 0.5    | 0.1    |
| 37                | 7.1                     | 7.0   | 5.6   | 4.7    | 0.5    | 0.1    |
| 38                | 5.9                     | 5.7   | 5.5   | 4.8    | 2.0    | 2.0    |
| 39                | 8.8                     | 6.2   | 6.2   | 4.8    | 1.0    | 0.1    |
| 40                | 7.8                     | 7.5   | 6.0   | 5.1    | 2.4    | 0.1    |
| 41                | 8.4                     | 8.8   | 6.0   | 4.8    | 0.5    | 0.1    |
| 42                | 6.9                     | 6.7   | 5.0   | 5.1    | 0.5    | 0.1    |
| 43                | 7.8                     | 6.5   | 6.1   | 5.0    | 1.5    | 0.1    |
| 44                | 8.7                     | 6.4   | 5.9   | 4.3    | 1.0    | 0.1    |
| 45                | 8.4                     | 6.5   | 6.3   | 4.3    | 1.0    | 2.5    |
| 46                | 8.2                     | 7.9   | 5.5   | 3.6    | 1.3    | 2.0    |
| 47                | 8.5                     | 7.5   | 7.0   | 3.7    | 0.5    | 0.1    |
| 48                | 5.4                     | 6.3   | 5.8   | 4.5    | 0.5    | 2.3    |
| 49                | 6.4                     | 6.1   | 5.3   | 4.0    | 2.0    | 0.1    |
| 50                | 6.0                     | 5.7   | 6.4   | 5.1    | 2.2    | 0.1    |
| 51                | 7.1                     | 6.8   | 6.9   | 4.6    | 1.3    | 2.0    |
| 52                | 8.3                     | 8.1   | 7.3   | 5.1    | 2.1    | 3.7    |
| 53                | 6.8                     | 6.4   | 6.6   | 5.1    | 1.3    | 2.8    |
| 54                | 7.8                     | 5.9   | 5.3   | 5.1    | 1.0    | 0.1    |
| 55                | 7.5                     | 7.4   | 6.6   | 5.0    | 1.0    | 2.3    |
| 56                | 7.9                     | 7.8   | 5.8   | 5.4    | 1.0    | 0.1    |
| 57                | 8.3                     | 8.2   | 6.6   | 4.8    | 1.3    | 0.1    |
| 58                | 6.1                     | 5.8   | 5.9   | 3.4    | 2.2    | 0.1    |
| 59                | 6.1                     | 6.7   | 5.5   | 5.5    | 0.5    | 2.0    |
| 60                | 7.7                     | 6.3   | 6.1   | 4.7    | 0.5    | 2.0    |
| 61                | 8.8                     | 7.7   | 7.3   | 4.5    | 0.5    | 0.1    |
| 62                | 7.4                     | 7.0   | 7.3   | 5.7    | 4.7    | 0.1    |
| 63                | 8.7                     | 6.5   | 5.0   | 5.0    | 0.5    | 0.1    |
| 64                | 7.5                     | 7.6   | 5.2   | 4.7    | 1.3    | 2.3    |
| 65                | 7.6                     | 6.8   | 6.7   | 5.3    | 0.5    | 0.1    |
| 66                | 7.8                     | 7.5   | 5.5   | 5.1    | 1.3    | 2.0    |
| <b>67 control</b> | 8.4                     | 8.1   | 5.1   | 6.3    | 4.4    | 4.6    |
